# Supplementary material
Source: HighWire-hosted journal article supplement (https://rapm.bmj.com/highwire/filestream/14095/field_highwire_adjunct_files/2/rapm-2020-101917supp003_data_supplement.pdf)
Supplement: rapm-2020-101917supp003_data_supplement.pdf [file rapm-2020-101917supp003_data_supplement.pdf]

## Appendix C – Risk of Bias Summary

|              | Random sequence generation (selection bias) | Allocation concealment (selection bias) | Blinding of participants and personnel (performance bias) | Blinding of outcome assessment (detection bias) | Incomplete outcome data (attrition bias) | Selective reporting (reporting bias) |
|--------------|---------------------------------------------|-----------------------------------------|-----------------------------------------------------------|-------------------------------------------------|------------------------------------------|--------------------------------------|
| Aksu 2019    | ?                                           | +                                       | +                                                         | -                                               | +                                        | +                                    |
| Arora 2019   | +                                           | +                                       | +                                                         | -                                               | ?                                        | +                                    |
| Divatia 2020 | +                                           | +                                       | +                                                         | -                                               | ?                                        | +                                    |
| Gupta 2020   | +                                           | +                                       | +                                                         | -                                               | ?                                        | +                                    |
| Gurkan 2018  | +                                           | +                                       | +                                                         | -                                               | ?                                        | +                                    |
| Gurkan 2020  | +                                           | +                                       | +                                                         | +                                               | +                                        | +                                    |
| He 2020      | +                                           | ?                                       | ?                                                         | -                                               | ?                                        | +                                    |
| Marzouk 2020 | ?                                           | ?                                       | +                                                         | +                                               | +                                        | +                                    |
| Seelam 2020  | +                                           | +                                       | ?                                                         | -                                               | +                                        | +                                    |
| Singh 2019   | +                                           | +                                       | ?                                                         | -                                               | +                                        | +                                    |
| Wang 2019    | +                                           | ?                                       | ?                                                         | -                                               | ?                                        | ?                                    |
| Yao 2020     | +                                           | +                                       | +                                                         | +                                               | +                                        | +                                    |

Figure Legend: +, low risk of bias; ?, unclear risk of bias; -, high risk of bias.
